# Supplementary material for: Fabrication of cuprous sulfide nanorods supported on copper foam for nonenzymatic amperometric determination of glucose and hydrogen peroxide
Source: Royal Society of Chemistry journal article supplement (doi:10.1039/c6ra18641f), 2016-01-01
Supplement: c6ra18641f1.pdf [file c6ra18641f1.pdf]

## Supporting Information

### Fabrication of cuprous sulfide nanorods supported on copper foam for nonenzymatic amperometric determination of glucose and hydrogen peroxide

Wangdong Lu,<sup>ab</sup> Yujing Sun<sup>a</sup>, Haichao Dai,<sup>ab</sup> Pengjuan Ni,<sup>ab</sup> Shu Jiang,<sup>ab</sup> Yilin Wang,<sup>ab</sup> Zhen Li,<sup>ab</sup> and Zhuang Li<sup>\*a</sup>

<sup>a</sup>State Key Laboratory of Electroanalytical Chemistry, Changchun Institute of Applied Chemistry, Changchun, 130022, Jilin, P. R. China.

<sup>b</sup>University of Chinese Academy of Sciences, Beijing, 100049, P. R. China

E-mail: zli@ciac.jl.cn; Fax: +86 431 85262057; Tel: +86 431 85262057

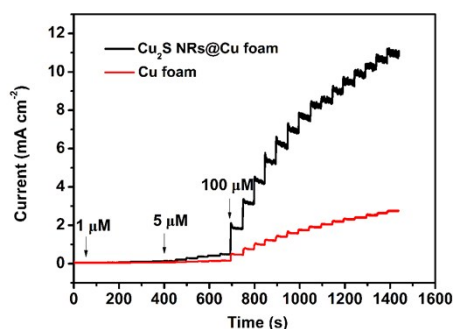

**Fig. S1** Typical amperometric response of the Cu foam and Cu<sub>2</sub>S NRs@Cu foam electrode at 0.45 V vs. SCE with the successive addition of glucose from 0.2 μM to 630 μM in 0.1 M NaOH solution.

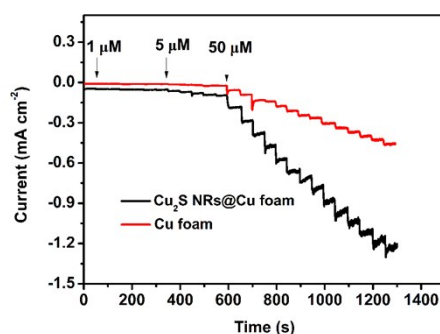

**Fig. S2** Typical amperometric response of the Cu foam and Cu<sub>2</sub>S NRs@Cu foam

electrode at the potential of -0.2 V vs. SCE with the successive addition of glucose from 1  $\mu\text{M}$  to 730  $\mu\text{M}$  in 0.1 M PBS solution.

**Table S1** The detection of glucose concentration in human serum samples. Each sample was measured in triplicate.

| Samples | Cu <sub>2</sub> S NRs@Cu foam | Biochemical analyzer | RSD (n=3) (%) | Recovery(%) |
|---------|-------------------------------|----------------------|---------------|-------------|
| 1       | 6.55                          | 6.70                 | 3.05          | 97.81       |
| 2       | 10.02                         | 10.10                | 7.02          | 99.17       |

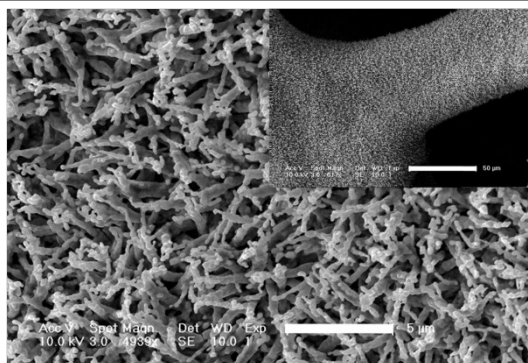

**Fig. S3** SEM images of Cu<sub>2</sub>O NRs@Cu foam.

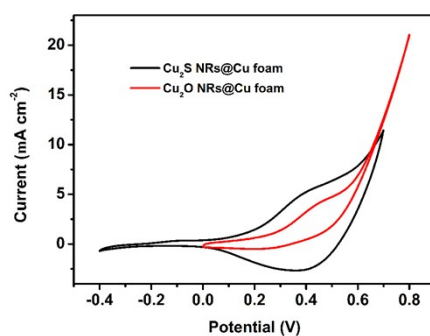

**Fig. S4** CVs of Cu<sub>2</sub>S NRs@Cu foam and Cu<sub>2</sub>O NRs@Cu foam in the presence of 1 mM H<sub>2</sub>O<sub>2</sub>). Scan rate: 50 mV s<sup>-1</sup>.

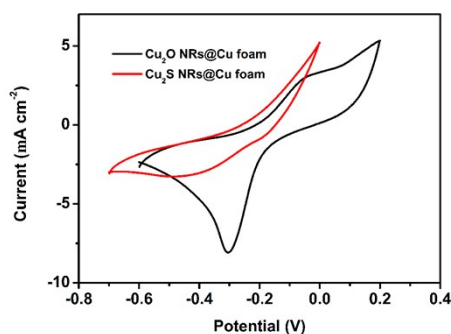

**Fig. S5** CVs of Cu<sub>2</sub>S NRs@Cu foam and Cu<sub>2</sub>O NRs@Cu foam in the presence of 1 mM glucose). Scan rate: 50 mV s<sup>-1</sup>.
